# Supplementary material for: Fabrication of blue organic light-emitting diodes from novel uranium complexes: synthesis, characterization, and electroluminescence studies of uranium anthracene-9-carboxylate complexes
Source: Royal Society of Chemistry journal article supplement (doi:10.1039/c8dt04981e), 2019-01-01
Supplement: c8dt04981e1.pdf [file c8dt04981e1.pdf]

## Electronic Supplementary Information

### **Fabrication of blue organic light-emitting diode from novel uranium complexes: Synthesis, characterization, and electroluminescence studies of uranium anthracene-9-carboxylate complexes**

Khodabakhsh Darzinezhad,<sup>a</sup> Mostafa M. Amini,<sup>\*a</sup> Ezeddin Mohajerani,<sup>c</sup> Mahsa Armaghan,<sup>b</sup> Tim Oliver Knedel,<sup>b</sup> Afshin Abareghi,<sup>c</sup> Christoph Janiak,<sup>\*b</sup>

Email addresses:

[dordikeshemeykhoone@yahoo.com](mailto:dordikeshemeykhoone@yahoo.com), [m-pouramini@sbu.ac.ir](mailto:m-pouramini@sbu.ac.ir), [e-mohajerani@sbu.ac.ir](mailto:e-mohajerani@sbu.ac.ir), [armaghan@uni-duesseldorf.de](mailto:armaghan@uni-duesseldorf.de), [tim-oliver.knedel@uni-duesseldorf.de](mailto:tim-oliver.knedel@uni-duesseldorf.de), [afabareghi@gmail.com](mailto:afabareghi@gmail.com), [janiak@hhu.de](mailto:janiak@hhu.de)

<sup>a</sup>*Department of Chemistry, ShahidBeheshti University, G.C., Tehran 1983963113, Iran*

<sup>b</sup>*Institut für Anorganische Chemie und Strukturchemie Heinrich-Heine Universität, D-40204  
Düsseldorf, Germany*

<sup>c</sup>*Laser and Plasma Research Institute, Shahid Beheshti University, G.C., 1983963113, Tehran,  
Iran*

**Table S1** Crystal data and structure refinement for **1**, **2** and **3**.

| <b>Complex</b>                                                                                     | <b>1</b>                                          | <b>2</b>                                                       | <b>3</b>                                                       |
|----------------------------------------------------------------------------------------------------|---------------------------------------------------|----------------------------------------------------------------|----------------------------------------------------------------|
| Empirical formula                                                                                  | C <sub>38</sub> H <sub>42</sub> O <sub>10</sub> U | C <sub>36</sub> H <sub>40</sub> O <sub>14</sub> U <sub>2</sub> | C <sub>62</sub> H <sub>48</sub> O <sub>16</sub> U <sub>2</sub> |
| Formula weight (g mol <sup>-1</sup> )                                                              | 896.75                                            | 1172.74                                                        | 1525.06                                                        |
| T (K)                                                                                              | 140                                               | 140                                                            | 140                                                            |
| Wavelength $\lambda$ (Å)                                                                           | 0.71073                                           | 0.71073                                                        | 0.71073                                                        |
| Crystal system                                                                                     | monoclinic                                        | triclinic                                                      | triclinic                                                      |
| Space group                                                                                        | <i>P</i> 2 <sub>1</sub> / <i>c</i>                | <i>P</i> -1                                                    | <i>P</i> -1                                                    |
| <i>a</i> (Å)                                                                                       | 7.8016(8)                                         | 8.9252(7)                                                      | 10.6301(6)                                                     |
| <i>b</i> (Å)                                                                                       | 26.772(3)                                         | 9.2387(7)                                                      | 11.9054(7)                                                     |
| <i>c</i> (Å)                                                                                       | 17.7555(19)                                       | 12.1717(9)                                                     | 11.9924(7)                                                     |
| $\alpha$ (°)                                                                                       | 90                                                | 68.676(3)                                                      | 110.639(3)                                                     |
| $\beta$ (°)                                                                                        | 93.142(5)                                         | 85.383(3)                                                      | 100.789(3)                                                     |
| $\gamma$ (°)                                                                                       | 90                                                | 84.565(3)                                                      | 98.333(3)                                                      |
| <i>V</i> (Å <sup>3</sup> )                                                                         | 3702.9(7)                                         | 929.58(12)                                                     | 1357.98(14)                                                    |
| <i>Z</i>                                                                                           | 4                                                 | 1                                                              | 1                                                              |
| <i>D</i> <sub>calc</sub> (mg m <sup>-3</sup> )                                                     | 1.609                                             | 2.095                                                          | 1.865                                                          |
| <i>F</i> (000)                                                                                     | 1768.0                                            | 552.0                                                          | 732.0                                                          |
| $\mu$ (mm <sup>-1</sup> )                                                                          | 4.439                                             | 8.767                                                          | 6.028                                                          |
| Crystal size (mm <sup>3</sup> )                                                                    | 0.328×0.346×0.679                                 | 0.05×0.1×0.2                                                   | 0.05×0.05×0.1                                                  |
| $\theta$ range (°)                                                                                 | 1.52-26.37                                        | 1.80-27.81                                                     | 1.88-27.91                                                     |
| Reflections collected                                                                              | 106147                                            | 19539                                                          | 24875                                                          |
| Unique reflection ( <i>R</i> <sub>int</sub> )                                                      | 7573 (0.033)                                      | 4370 (0.037)                                                   | 6208 (0.025)                                                   |
| <i>R</i> <sub>1</sub> , w <i>R</i> <sub>2</sub> <sup>a</sup> [ <i>I</i> > 2 $\sigma$ ( <i>I</i> )] | 0.020, 0.045                                      | 0.018, 0.048                                                   | 0.020, 0.037                                                   |
| <i>R</i> <sub>1</sub> , w <i>R</i> <sub>2</sub> <sup>a</sup> (all data)                            | 0.022, 0.046                                      | 0.019, 0.049                                                   | 0.017, 0.038                                                   |

Goodness-of-fit (GOF) on  $F^2$  1.10

1.04

1.03

---

$${}^aR_1 = \frac{\sum |F_o| - |F_c|}{\sum |F_o|}, \quad wR_2 = [\frac{\sum (w(F_o^2 - F_c^2)^2)}{\sum w(F_o^2)^2}]^{1/2}$$

**Table S2** Selected bond lengths (Å) and bond angles (°) for **1**.

|                |            |                |            |
|----------------|------------|----------------|------------|
| U(1)–O(1)      | 1.747(2)   | U(1)–O(5)      | 2.500(2)   |
| U(1)–O(2)      | 1.750(2)   | U(1)–O(6)      | 2.4931(19) |
| U(1)–O(3)      | 2.481(2)   | U(1)–O(7)      | 2.433(2)   |
| U(1)–O(4)      | 2.506(2)   | U(1)–O(8)      | 2.4246(19) |
|                |            |                |            |
| O(1)–U(1)–O(2) | 179.51(11) | O(3)–U(1)–O(6) | 179.27(9)  |
| O(1)–U(1)–O(8) | 91.40(11)  | O(1)–U(1)–O(5) | 92.34(10)  |
| O(2)–U(1)–O(8) | 88.83(12)  | O(2)–U(1)–O(5) | 87.18(11)  |
| O(1)–U(1)–O(7) | 87.45(12)  | O(8)–U(1)–O(5) | 115.20(7)  |
| O(2)–U(1)–O(7) | 92.32(12)  | O(7)–U(1)–O(5) | 65.09(7)   |
| O(8)–U(1)–O(7) | 178.83(9)  | O(3)–U(1)–O(5) | 128.82(7)  |
| O(1)–U(1)–O(3) | 92.13(10)  | O(6)–U(1)–O(5) | 50.90(6)   |
| O(2)–U(1)–O(3) | 88.15(10)  | O(1)–U(1)–O(4) | 91.01(10)  |
| O(8)–U(1)–O(3) | 115.61(7)  | O(2)–U(1)–O(4) | 89.48(11)  |
| O(7)–U(1)–O(3) | 64.23(7)   | O(8)–U(1)–O(4) | 64.94(7)   |
| O(1)–U(1)–O(6) | 88.57(10)  | O(7)–U(1)–O(4) | 114.84(7)  |
| O(2)–U(1)–O(6) | 91.15(10)  | O(3)–U(1)–O(4) | 50.74(7)   |
| O(8)–U(1)–O(6) | 64.58(6)   | O(6)–U(1)–O(4) | 129.49(7)  |
| O(7)–U(1)–O(6) | 115.59(7)  | O(5)–U(1)–O(4) | 176.65(10) |

**Table S3** Selected bond lengths (Å) and bond angles (°) for **2**.

|                |            |                |           |
|----------------|------------|----------------|-----------|
| U(1)–O(3)      | 1.769(2)   | U(1)–O(2)      | 2.453(2)  |
| U(1)–O(4)      | 1.766(2)   | U(1)–O(1)      | 2.489(2)  |
| U(1)–O(6)      | 2.3264(19) | U(1)–O(5)      | 2.400(2)  |
| O(3)–U(1)–O(4) | 176.73(9)  | O(4)–U(1)–O(1) | 90.68(9)  |
| O(3)–U(1)–O(6) | 92.43(9)   | O(6)–U(1)–O(1) | 159.51(7) |
| O(4)–U(1)–O(6) | 93.14(9)   | O(5)–U(1)–O(1) | 73.16(7)  |
| O(3)–U(1)–O(6) | 90.12(9)   | O(2)–U(1)–O(1) | 52.64(7)  |
| O(4)–U(1)–O(6) | 93.14(9)   | O(3)–U(1)–O(1) | 87.31(9)  |
| O(6)–U(1)–O(6) | 70.67(8)   | O(5)–U(1)–O(2) | 125.80(7) |
| O(3)–U(1)–O(5) | 88.53(9)   | O(6)–U(1)–O(2) | 77.22(7)  |
| O(4)–U(1)–O(5) | 88.43(9)   | O(4)–U(1)–O(2) | 91.79(9)  |
| O(6)–U(1)–O(5) | 86.35(7)   | O(3)–U(1)–O(2) | 89.03(9)  |

**Table S4** Selected bond lengths (Å) and bond angles (°) for **3**.

|                |            |                |            |
|----------------|------------|----------------|------------|
| U(1)–O(4)      | 1.7621(16) | U(1)–O(7)      | 2.3619(16) |
| U(1)–O(3)      | 1.7622(16) | U(1)–O(2)      | 2.5091(17) |
| U(1)–O(5)      | 2.3769(18) | U(1)–O(1)      | 2.4139(19) |
| U(1)–O(6)      | 2.3154(18) |                |            |
| O(4)–U(1)–O(3) | 177.51(9)  | O(7)–U(1)–O(2) | 122.44(6)  |
| O(4)–U(1)–O(5) | 85.33(8)   | O(4)–U(1)–O(1) | 90.13(8)   |
| O(3)–U(1)–O(5) | 92.31(8)   | O(3)–U(1)–O(1) | 91.91(8)   |
| O(4)–U(1)–O(6) | 90.87(7)   | O(5)–U(1)–O(1) | 126.73(6)  |
| O(3)–U(1)–O(6) | 87.98(7)   | O(6)–U(1)–O(1) | 152.13(6)  |
| O(5)–U(1)–O(6) | 81.09(6)   | O(7)–U(1)–O(1) | 70.83(6)   |
| O(4)–U(1)–O(7) | 91.30(7)   | O(2)–U(1)–O(1) | 52.31(6)   |
| O(3)–U(1)–O(7) | 90.71(7)   | O(6)–U(1)–O(2) | 154.73(6)  |
| O(5)–U(1)–O(7) | 162.02(7)  | O(5)–U(1)–O(2) | 75.52(6)   |
| O(6)–U(1)–O(7) | 81.30(6)   | O(3)–U(1)–O(2) | 83.57(7)   |
| O(4)–U(1)–O(2) | 96.57(7)   |                |            |

**Table S5** Summary of short  $\pi$ - $\pi$  ring-interactions in the crystal structures of complexes **2** and **3**.

| <b>Cg(I)⋯Cg(J)</b>                                               | <b>Cg⋯Cg ( Å )</b> | <b><math>\alpha</math> (°)</b> | <b><math>\beta</math> (°)</b> | <b><math>\gamma</math>(°)</b> | <b>Slippage ( Å )</b> | <b>Symmetry operation on Cg(J)</b> |
|------------------------------------------------------------------|--------------------|--------------------------------|-------------------------------|-------------------------------|-----------------------|------------------------------------|
| <b>2</b>                                                         |                    |                                |                               |                               |                       |                                    |
| Cg1-Cg1                                                          | 3.7136(19)         | 0.00(15)                       | 21.5                          | 21.5                          | 1.359                 | 2-x,1-y,-y                         |
| Cg1-Cg3                                                          | 3.664(2)           | 1.11(17)                       | 18.7                          | 19.2                          | 1.174                 | 2-x,1-y,-z                         |
| Cg2-Cg3                                                          | 3.747(2)           | 1.92(18)                       | 22.2                          | 20.3                          | 1.414                 | 2-x,1-y,-z                         |
| Cg1 (C2, C3, C8, C9, C10, C15), Cg2 (C3>C8), Cg3 (C10>C15)       |                    |                                |                               |                               |                       |                                    |
| <b>3</b>                                                         |                    |                                |                               |                               |                       |                                    |
| Cg1- Cg1                                                         | 3.8469 (13)        | 0.03(10)                       | 17.6                          | 17.6                          | 1.160                 | -x, -y, -z                         |
| Cg1- Cg3                                                         | 3.9136 (14)        | 0.61(11)                       | 20.8                          | 20.2                          | 1.390                 | -x, -y, -z                         |
| Cg3- Cg2                                                         | 3.8181 (14)        | 2.15(11)                       | 17.0                          | 18.4                          | 1.114                 | -x, -y, -z                         |
| Cg1 (C2, C3, C8, C9, C10, C15), Cg2 (C3>C8), Cg3 (C10>C15)       |                    |                                |                               |                               |                       |                                    |
| Cg is the centroid of the ring                                   |                    |                                |                               |                               |                       |                                    |
| $\alpha$ =Dihedral angle between Planes Cg                       |                    |                                |                               |                               |                       |                                    |
| $\beta$ =Angle between Cg(I)→ Cg(J) vector and normal to plane I |                    |                                |                               |                               |                       |                                    |
| $\gamma$ =Angle between Cg → Cg vector and normal to plane J     |                    |                                |                               |                               |                       |                                    |

**Table S6** Summary of intermolecular X-H... $\pi$  interactions in the crystal structures of complexes **1**, **2**, and **3**.

| X-H                                                                   | Cg                      | H...Cg( Å) | X...Cg( Å) | $\gamma$ (°) | X-H...Cg (°) |
|-----------------------------------------------------------------------|-------------------------|------------|------------|--------------|--------------|
| <b>1</b>                                                              |                         |            |            |              |              |
| C17-H17                                                               | Cg (C4-C6, C11-C13)     | 2.83       | 3.3906(4)  | 12.76        | 119          |
| C19-H19                                                               | Cg (C1-C4, C13-C14)     | 2.86       | 3.5220(4)  | 7.22         | 127          |
| C35-H35B                                                              | Cg (C18-C20, C25-C27)   | 2.76       | 3.6936(4)  | 7.35         | 156          |
| C37-H37B                                                              | Cg (C4-C6, C11-C13)     | 2.87       | 3.7345(4)  | 14.10        | 147          |
| <b>2</b>                                                              |                         |            |            |              |              |
| C17-H17                                                               | Cg (C10>C15)            | 2.72       | 3.437(4)   | 8.59         | 131          |
| <b>3</b>                                                              |                         |            |            |              |              |
| O8-H8B                                                                | (C26>C31)               | 2.68(4)    | 3.324(3)   | 18.77        | 135(4)       |
| C25-H25                                                               | (C10>C15)               | 2.92       | 3.746(2)   | 6.11         | 146          |
| C27-H27                                                               | Cg (C2-C3, C8-C10, C15) | 2.60       | 3.350(2)   | 15.58        | 136          |
| $\gamma$ = Angle between Cg $\rightarrow$ H vector and ring Cg normal |                         |            |            |              |              |

**Table S7** Photophysical data of complexes, anthracene-9-carboxylic acid and uranyl acetate dihydrate.

|                              | absorption            |                                     | emission              |           |
|------------------------------|-----------------------|-------------------------------------|-----------------------|-----------|
|                              | $\lambda_{\max}$ (nm) | $\epsilon$ (L/mol cm) $\times 10^3$ | $\lambda_{\max}$ (nm) | FWHM (nm) |
| Complex <b>1</b>             | 250, 368              | 2599, 363                           | 440                   | 75        |
| Complex <b>2</b>             | 256, 368              | 1113, 64                            | 443                   | 70        |
| Complex <b>3</b>             | 255, 367              | 2151, 700                           | 443                   | 75        |
| Anthracene-9-carboxylic acid | 252, 364              | 2.62, 1.64                          | 441                   | 75        |
| Uranyl acetate dihydrate     | 239                   | 0.80                                | 615                   | 72        |



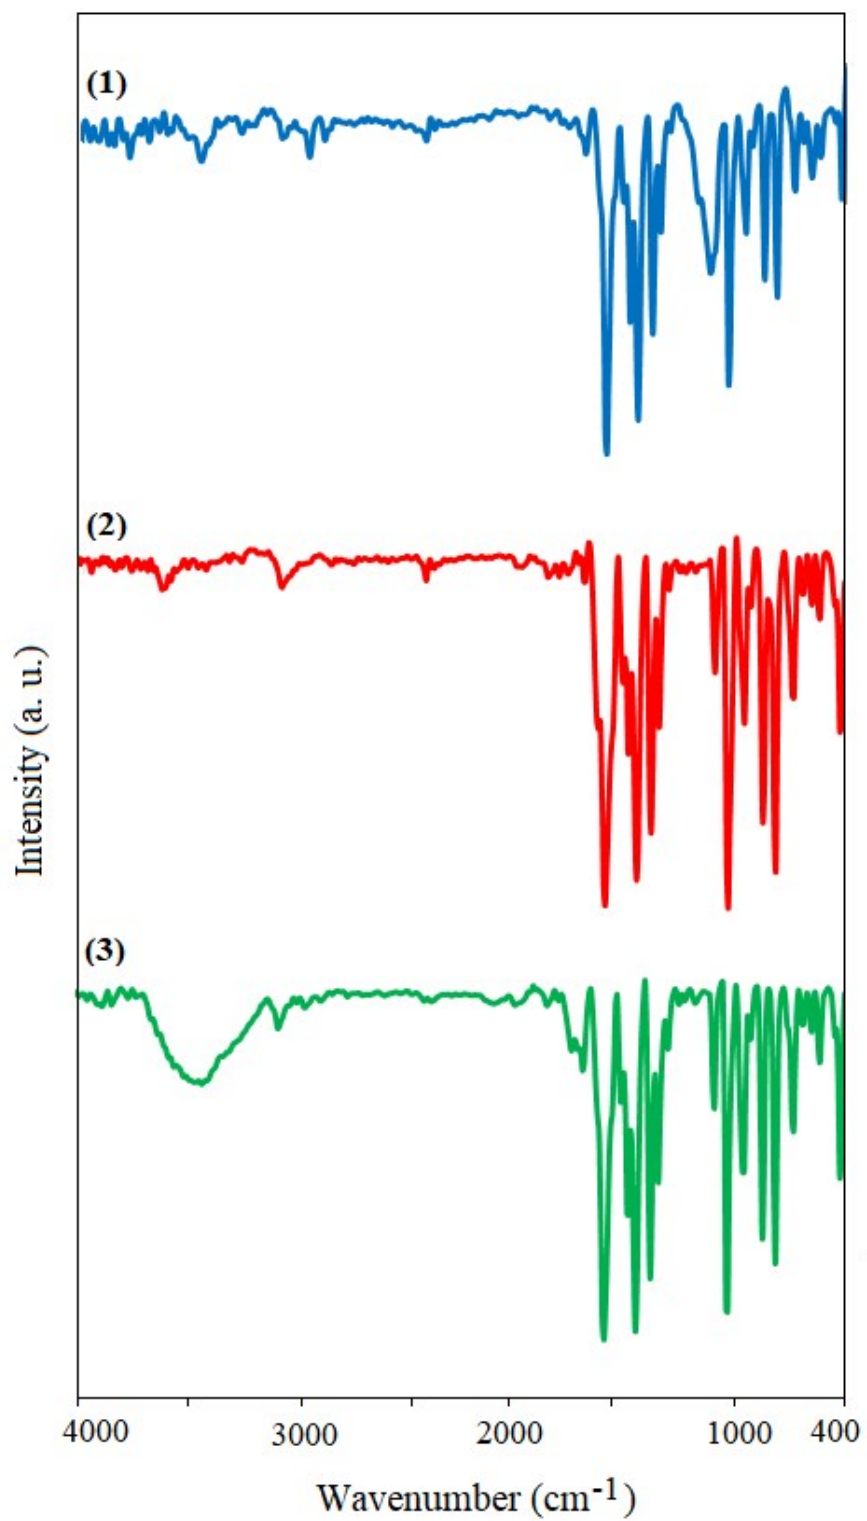

**Figure S1** Infrared spectra of compounds **1**, **2** and **3**.

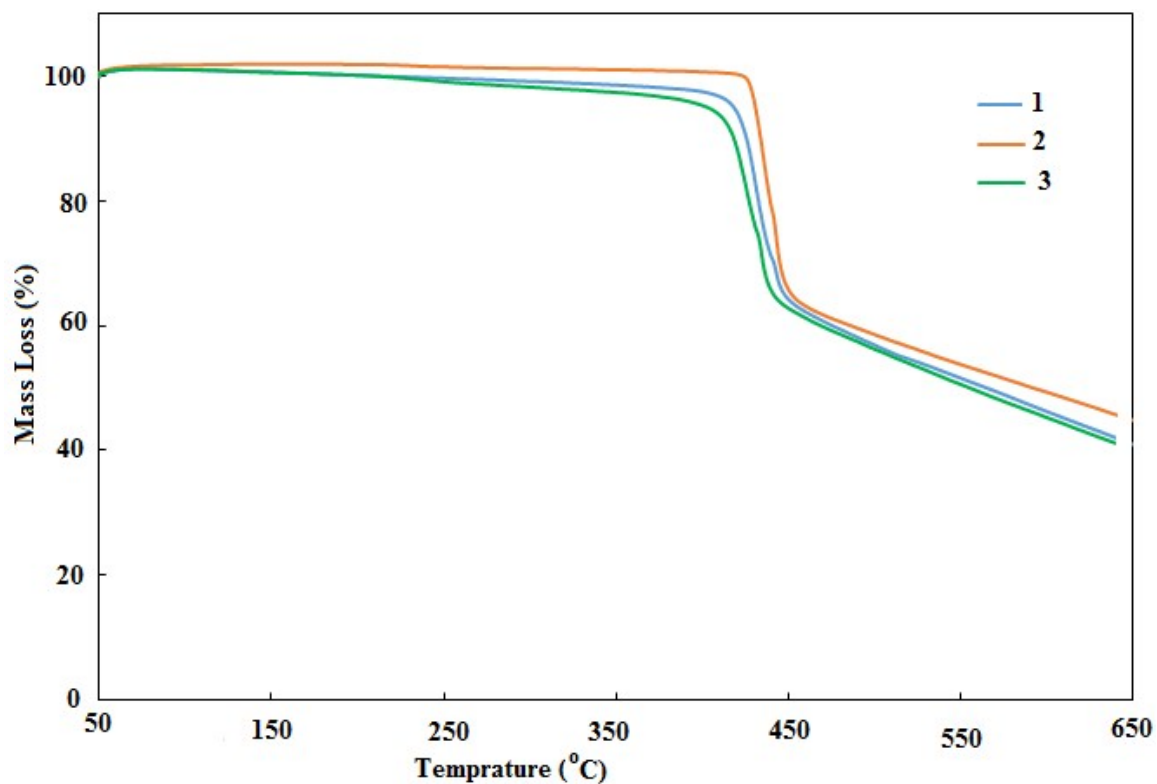

**Figure S2** TGA diagrams of compounds **1**, **2** and **3**.

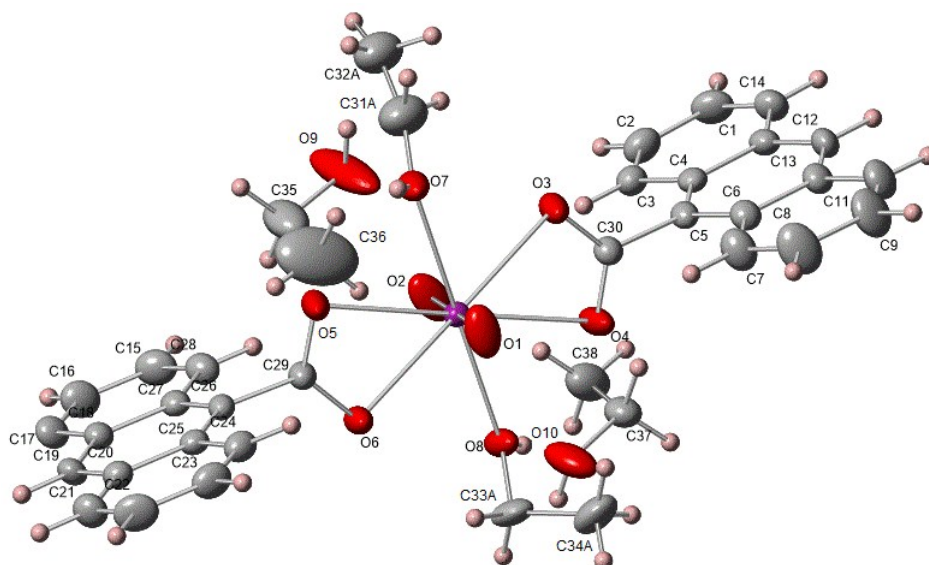

**Figure S3** X-ray molecular structure for  $[\text{UO}_2(\text{C}_{15}\text{H}_9\text{O}_2)_2(\text{CH}_3\text{CH}_2\text{OH})_2] \cdot 2\text{CH}_3\text{CH}_2\text{OH}$  (**1**) with the atom-labeling scheme. Displacement ellipsoids are drawn at the 50% probability level.

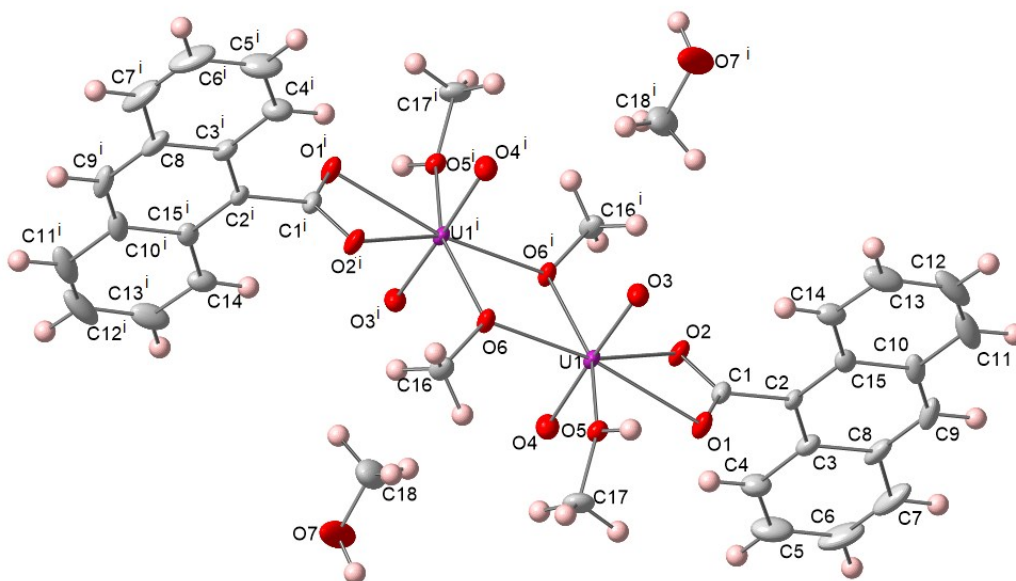

**Figure S4** X-ray molecular structure for  $[\text{U}_2\text{O}_4(\text{C}_{15}\text{H}_9\text{O}_2)_2(\text{CH}_3\text{O})_2(\text{CH}_3\text{OH})_2] \cdot 2\text{CH}_3\text{OH}$  (**2**) with the atom-labeling scheme. Displacement ellipsoids are drawn at the 50% probability level. Symmetry transformation  $i = 1-x, 1-y, 1-z$ .

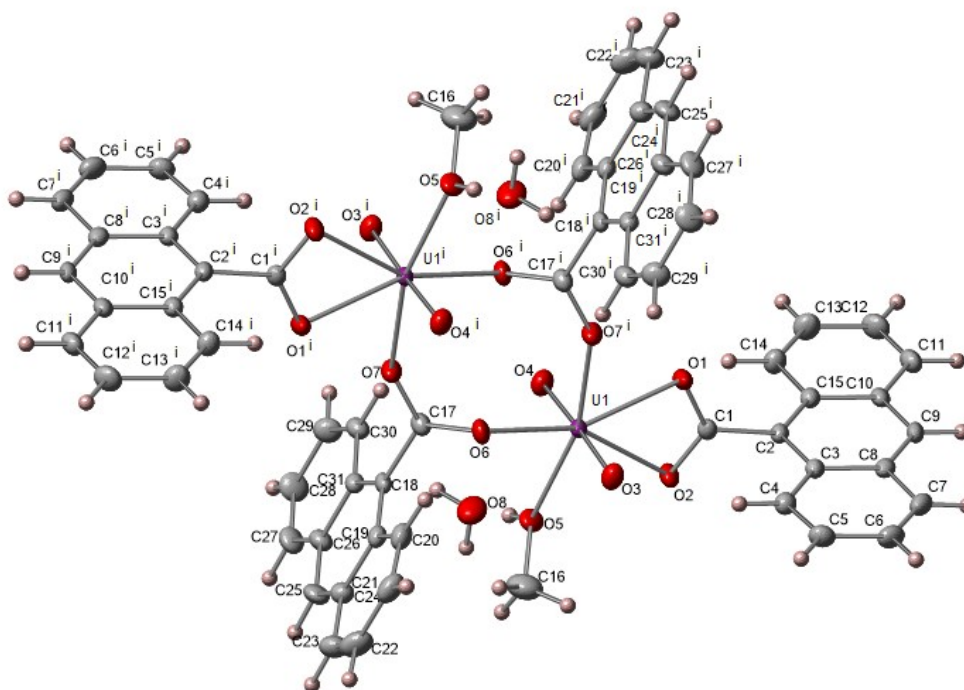

**Figure S5** X-ray molecular structure for  $[\text{U}_2\text{O}_4(\text{C}_{15}\text{H}_9\text{O}_2)_4(\text{CH}_3\text{OH})_2] \cdot 2\text{H}_2\text{O}$  (**3**) with the atom-labeling scheme. Displacement ellipsoids are drawn at the 50% probability level. Symmetry transformation  $i = 1-x, 1-y, -z$ .

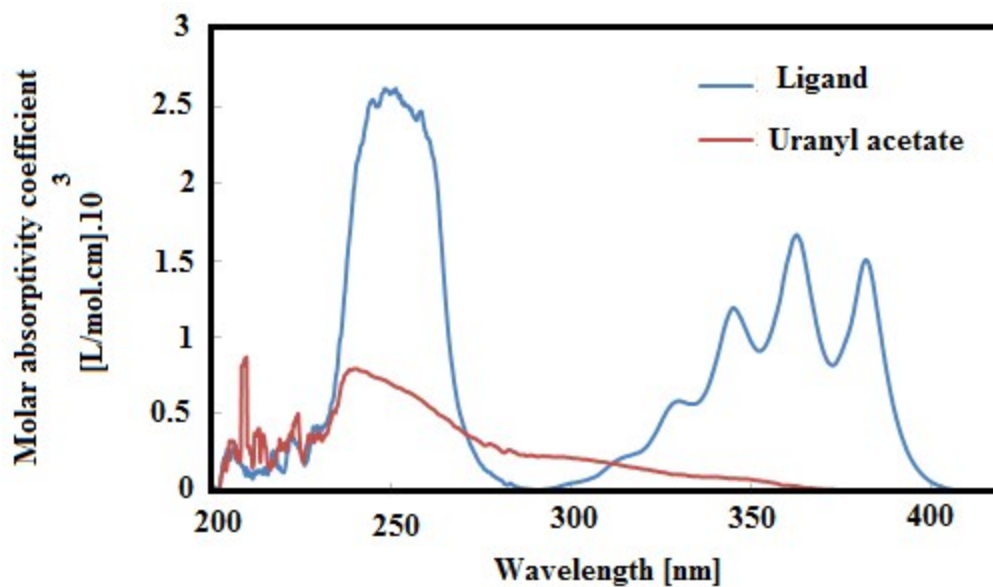

**Figure S6** UV spectra of anthracene-9-carboxylic acid (non-deprotonated ligand) and uranyl acetate dihydrate.

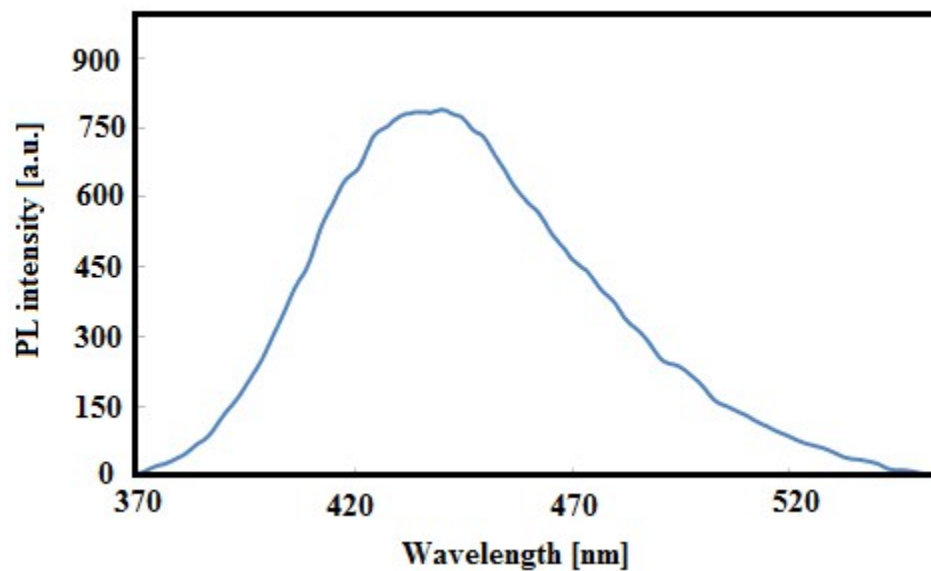

**Figure S7** PL spectrum of anthracene-9-carboxylic acid at an excitation wavelength of 270 nm.

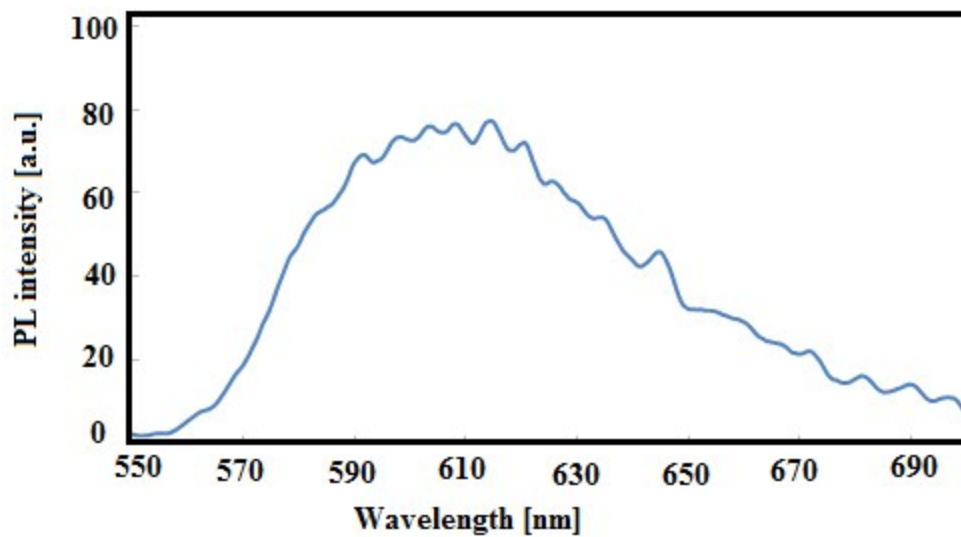

**Figure S8** PL spectrum of uranyl acetate dihydrate at an excitation wavelength of 270 nm.

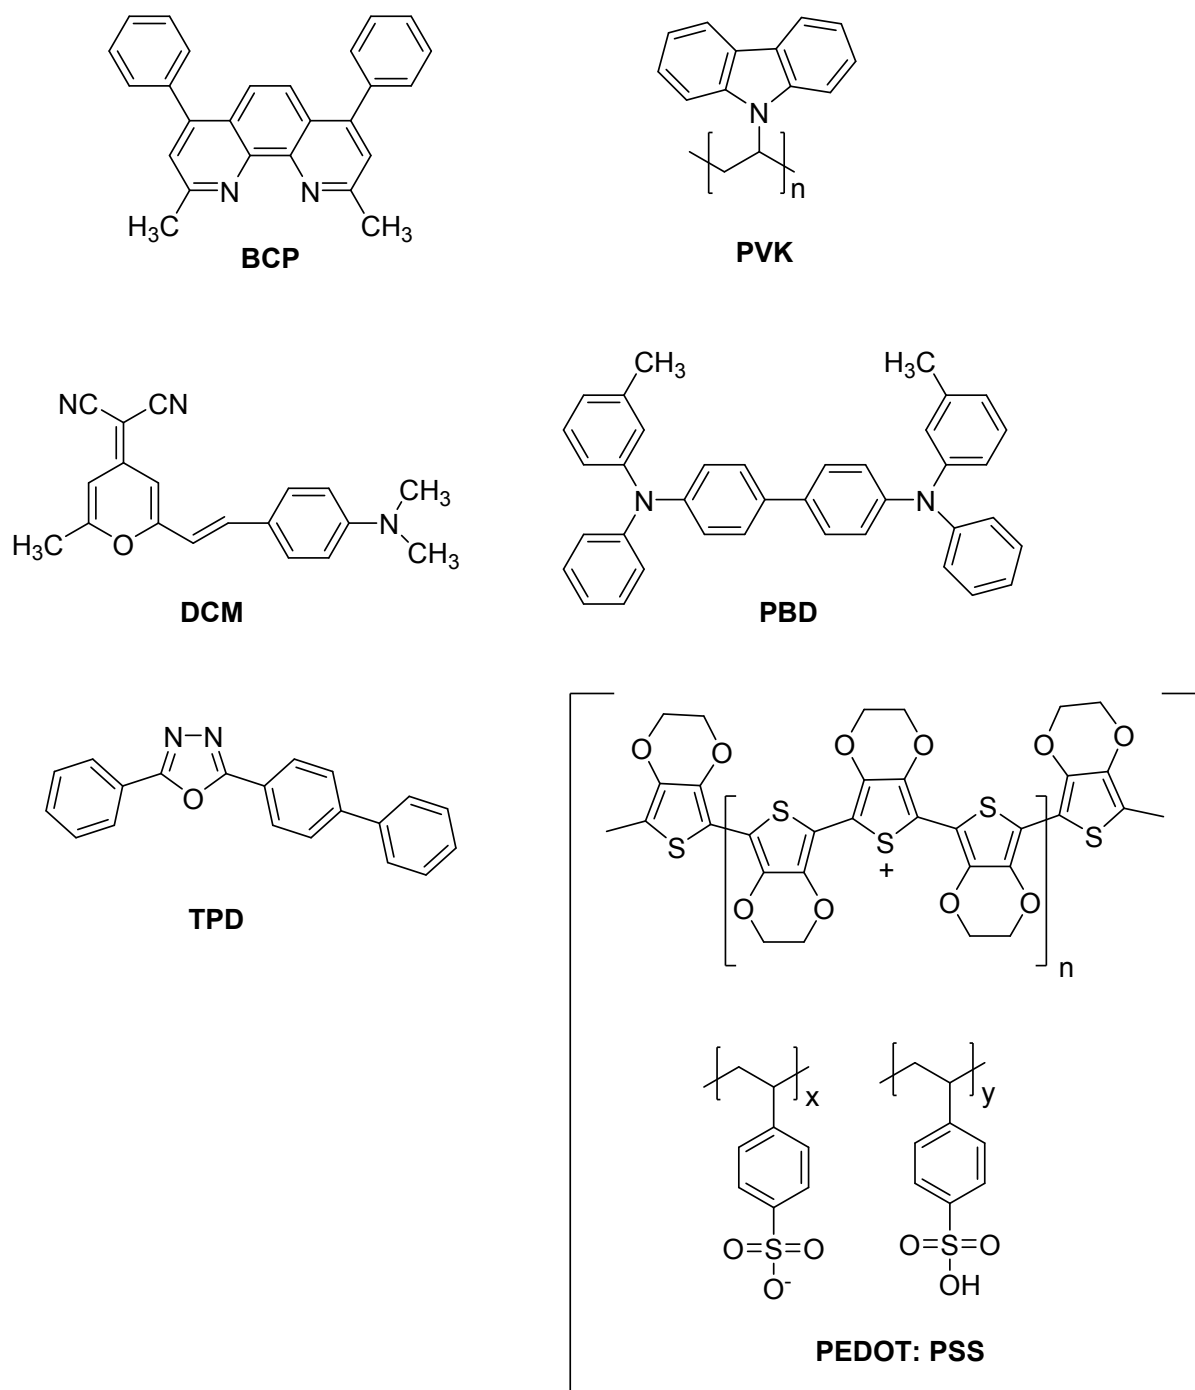

**Scheme S1** Formulae of materials used to fabricate the BOLED: 2,9-dimethyl-4,7-diphenyl-1,10-phenanthroline (BCP), poly(9-vinylcarbazole) (PVK), 4-(dicyanomethylene)-2-methyl-6-(4-dimethylaminostyryl)-4H-pyran (DCM), *N,N'*-bis(3-methylphenyl)-*N,N'*-diphenylbenzidine (TPD), 2-phenyl-5-(4-biphenyl)-1,3,4-oxadiazole (PBD), poly(3,4-ethylenedioxythiophene) poly(styrenesulfonate) (PEDOT:PSS.)
